# Supplementary material for: Urea-Assisted Synthesis of Mesoporous TiO2 Photocatalysts for the Efficient Removal of Clofibric Acid from Water
Source: MDPI journal article supplement (doi:10.3390/ma14206035), 2021-10-13
Supplement: s1 [file s1]

## Supplementary Materials

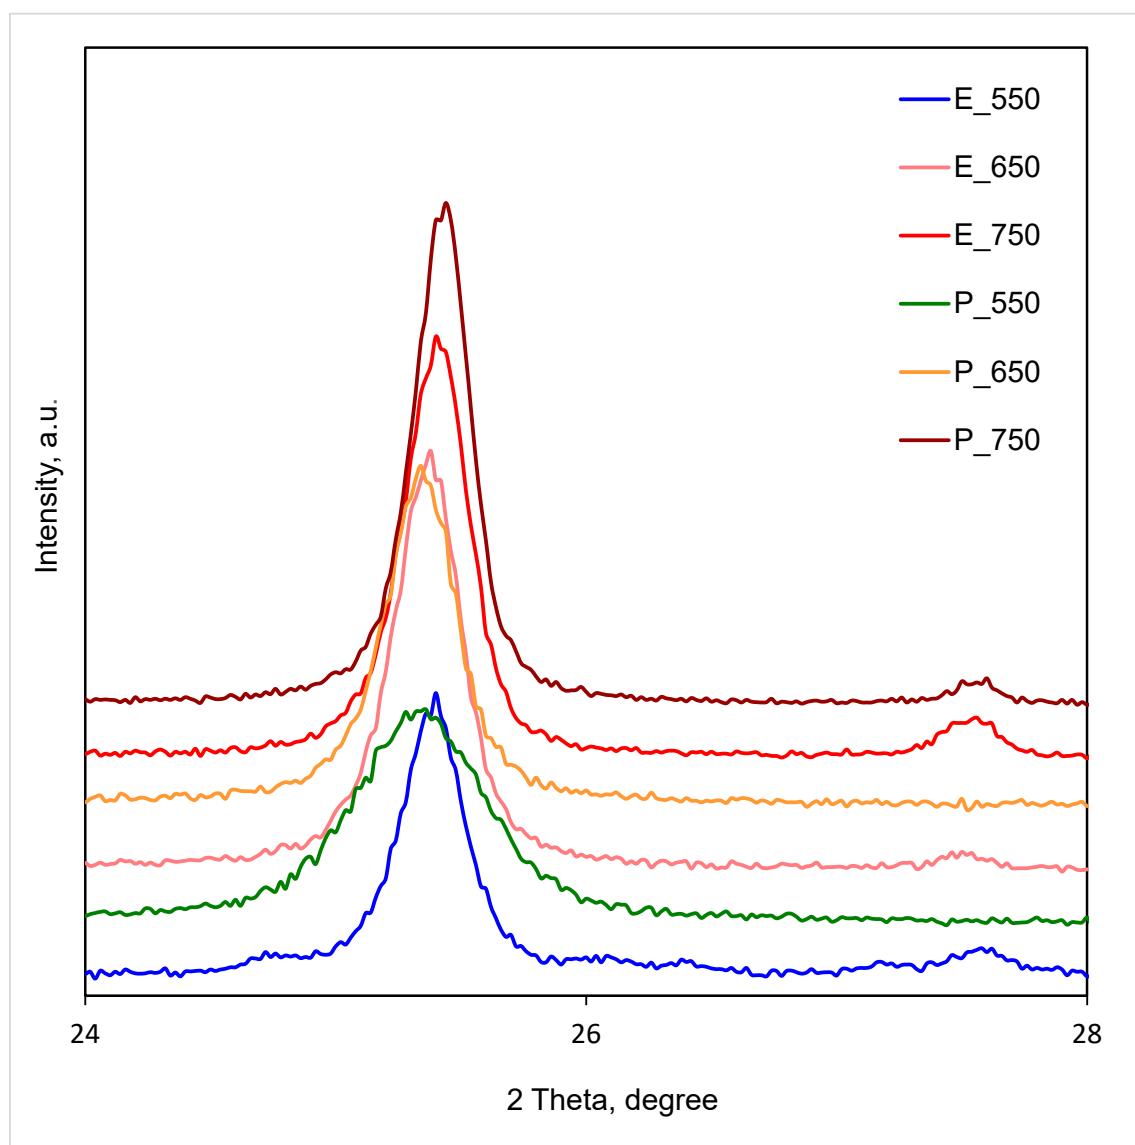

**Figure S1.** Details about the X-ray diffraction maxima width.

Sample

Magnification degree 10000 x

Magnification degree 50000 x

E-550

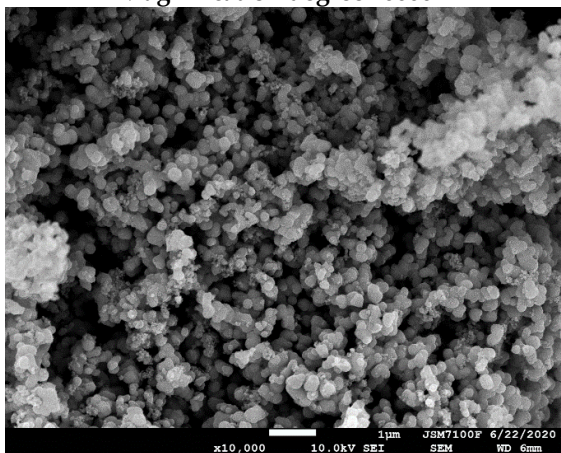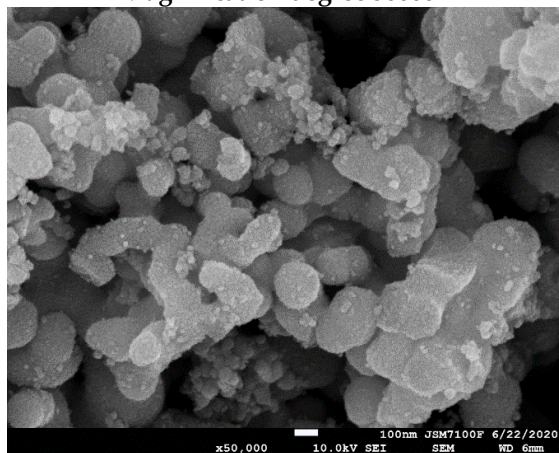

E-650

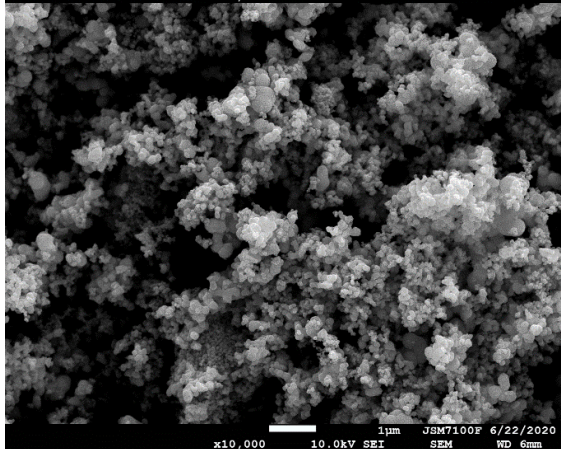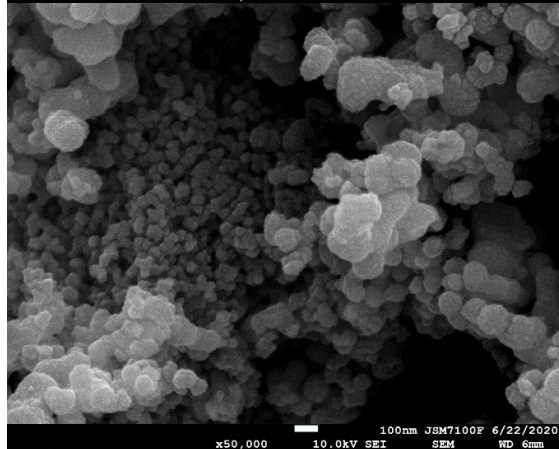

E-750

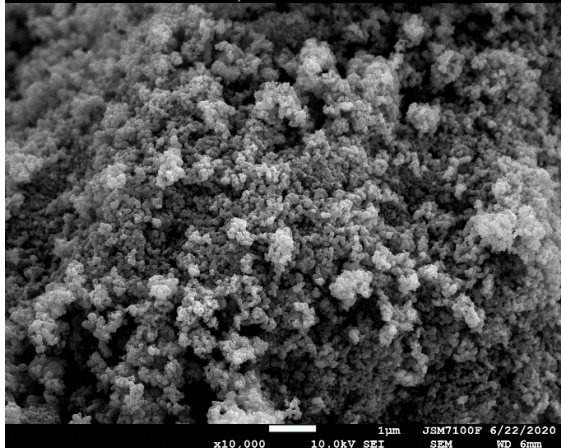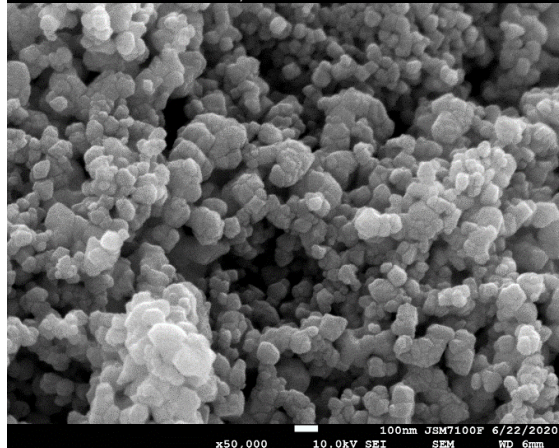



P-550

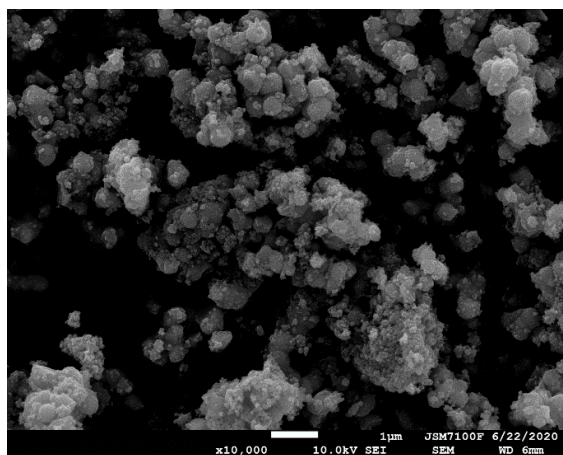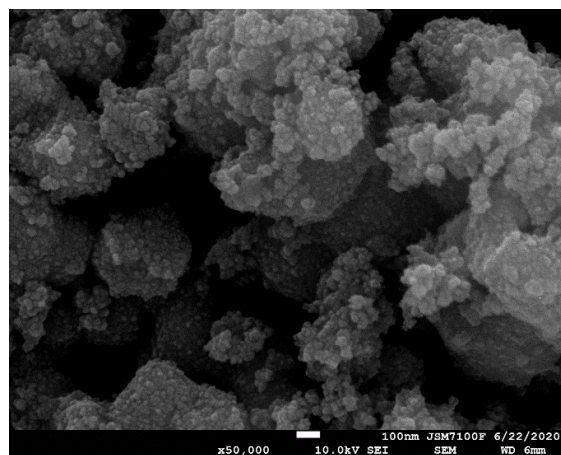

P-650

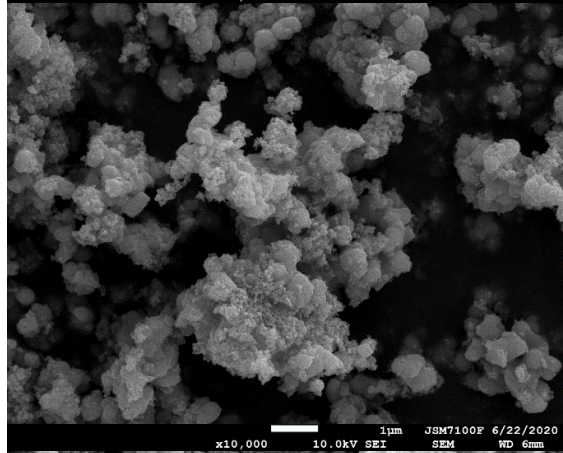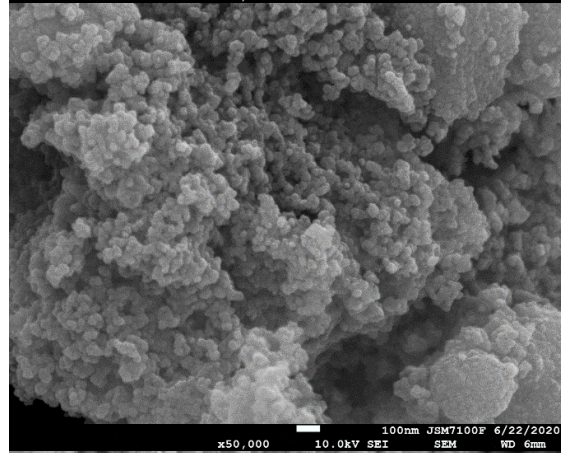

P-750

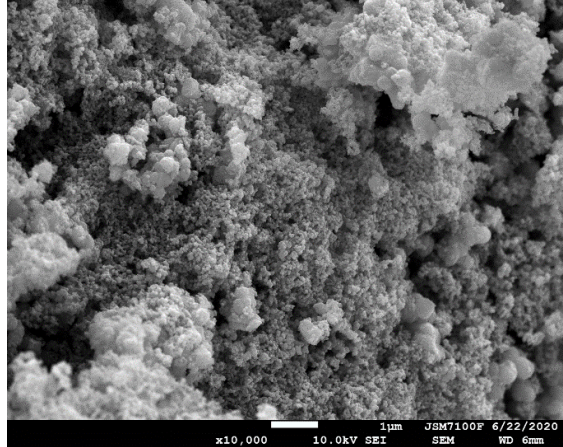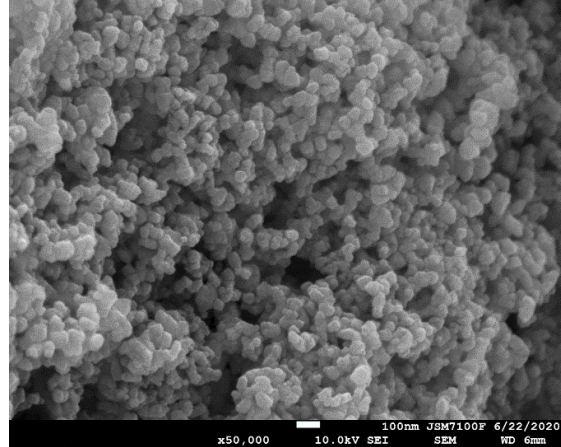

Figure S2. SEM images of the samples at different magnification degrees.
